# Supplementary material for: Role of asymptomatic bacteriuria on early periprosthetic joint infection after Hip Hemiarthroplasty. BARIFER randomized clinical trial.
Source: Research Square preprint supplement (doi:10.21203/rs.3.rs-203528/v1), 2021-03-01
Supplement: Supplementary file 1 [file b75d27acc34d712e6a9b83bf.docx]

Supplementary Table 1.Preoperative antibiotic prophylaxis for HHA surgery by site

| Centre | Antibiotic Prophylaxis protocol |
| --- | --- |
| 1 | 2 g iv cefazolin immediately preoperatively and 1 g cefazolin every 8h for 24h (600 mg clindamycin immediately preoperatively and continue with clindamycin 600 mg every 8 hours for 24h if allergic) |
| 2 | iv cefazolin immediately preoperatively and 1 g cefazolin every 8 h for 24h (600 mg clindamycin immediately preoperatively and continue with clindamycin 600 mg every 8h for 24h if allergic) |
| 3 | 2 g iv cefazolin immediately preoperatively and 1 g cefazolin every 8h for 24h (600 mg clindamycin immediately preoperatively and continue with clindamycin 600 mg every 8h for 24 h if allergic) |
| 4 | 2 g iv cefazolin immediately preoperatively and 1 g cefazolin every 8h for 24h (600 mg clindamycin immediately preoperatively and continue with clindamycin 600 mg every 8 h for 24h if allergic) |
| 5 | 2 g iv cefazolin immediately preoperatively and 1-2 g cefazolin every 6 hours for 24h (vancomycin 1 g immediately preoperatively and every 12 h for 24 h if allergic) |
| 6 | 2g iv cefazolin immediately preoperatively and 1-2 g cefazolin every 6 hours for 24h (vancomycin 1 g immediately preoperatively and every 12h for 24h if allergic) |
| 7 | 2 g iv cefazolin immediately preoperatively and 1 g cefazolin every 8h for 24h (vancomycin 1g immediately preoperatively and every 12h for 24h if allergic) |
| 8 | 2 g iv cefazolin (teicoplanin 800 mg + gentamycin 3-5 mg/kg single doses if allergic) immediately preoperatively and 1 g cefazolin every 8h for 24h |
| 9 | 2 g iv cefazolin plus gentamycin 1, 5 mg/kg single doses immediately preoperatively  In patients colonized by MRSA teicoplanin 10 mg/kg + gentamycin 3-5 mg/kg single doses |
| 10 | Standard: 2g iv cefazolin during anesthesia induction followed by two further doses of 1 g each 8h in non-beta-lactam allergic patients.  In beta-lactam allergic patients: 600 mg clindamycin along with gentamycin 3- 5 mg/kg single dose immediately preoperatively and continue with clindamycin 600 mg every 8 h for 24 h.  For long term centers institutionalized patients: cotrimoxazole 800/160 mg immediately preoperatively and every 12h for 24h (prophylaxis in MRSA colonized patients) |
| 11 | 2 g iv cefazolin (vancomycin 1g immediately preoperatively and every 12h for 24h or teicoplanin 10 mg/kg single dose if allergic) immediately preoperatively and 1 g cefazolin every 8h for 24h |

Abbreviations: MRSA, methicillin resistant *S. aureus*
